# Supplementary material
Source: publisher figshare collection journal article supplement (https://acs.figshare.com/ndownloader/files/20168444)
Supplement: Supplementary file 1 [file 20168444]

## Sheet: Sheet1
	ki/KI (M-1 s-1)
GUS	1	2	3	4
EcGUS	N.M.	12 ± 3	2000 ± 100	280 ± 10
BuGUS-1	2.8 ± 0.3	2.8 ± 0.4	7 ± 1	N.M.
BuGUS-2	N.M.	460 ± 60	910 ± 80	66 ± 2
Values shown are the mean ± standard deviation using N=3 biological replicates.
N.M. = not measurable due to slow inhibition
Higher values indicate more potent inhibition.
